# Supplementary material for: The impact of Helicobacter pylori infection, eradication therapy and probiotic supplementation on gut microenvironment homeostasis: An open-label, randomized clinical trial
Source: PubMed Central journal article supplement — eBioMedicine. 2018 Aug 23;35:87–96. doi: 10.1016/j.ebiom.2018.08.028 (PMC6161473; doi:10.1016/j.ebiom.2018.08.028), 2018-08-23
Supplement: mmc1.pdf [file mmc1.pdf]

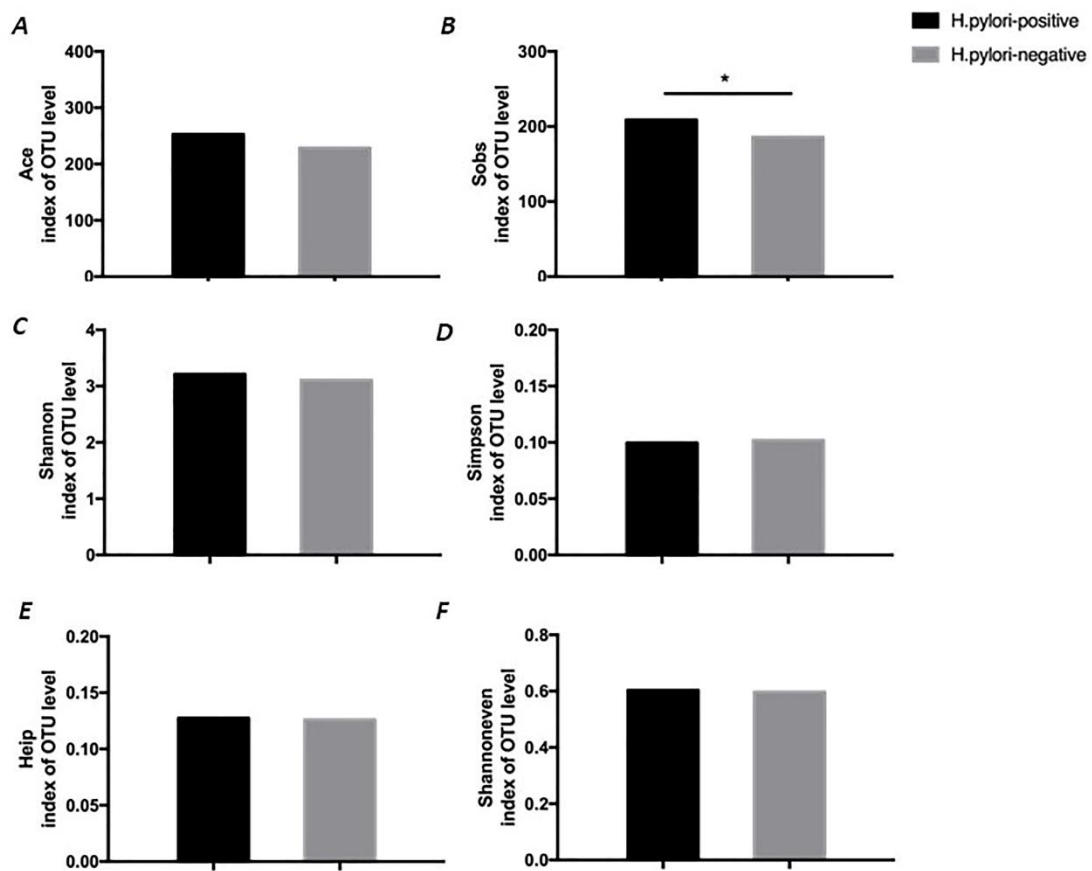

**Supplementary Figure 1.** Alpha diversity indices difference between *H. pylori*-positive group and *H. pylori*-negative group. Ace (A) and Sobs (B) indices represent richness of community; Shannon (C) and Simpson (D) indices represent diversity of community; Heip (E) and Shannoneven (F) indices represent evenness of community. \*,  $p < 0.05$ .

**Supplementary Table 1** Bacterial taxa with significant different abundances between *H. pylori*-positive and *H. pylori*-negative groups

| Bacterial taxa                               | <i>H. pylori</i> -positive |         | <i>H. pylori</i> -negative |         | p   |
|----------------------------------------------|----------------------------|---------|----------------------------|---------|-----|
|                                              | Relative abundance (%)     | SD (%)  | Relative abundance (%)     | SD (%)  |     |
| <b>Genus level</b>                           |                            |         |                            |         |     |
| <i>Sphingomonas</i>                          | 0.00035                    | 0.00146 | 0.00242                    | 0.00361 | *** |
| <i>Bacillus</i>                              | 0.00004                    | 0.00032 | 0.00110                    | 0.00249 | **  |
| <i>Streptomyces</i>                          | 0.00013                    | 0.00058 | 0.00126                    | 0.00255 | **  |
| <i>Faecalibaculum</i>                        | 0.00008                    | 0.00045 | 0.00070                    | 0.00152 | **  |
| <i>Acidothermus</i>                          | 0                          | 0       | 0.00093                    | 0.00347 | **  |
| <i>norank_f__Lachnospiraceae</i>             | 1.25200                    | 2.28000 | 2.00000                    | 2.75700 | **  |
| <i>Pseudarthrobacter</i>                     | 0.00008                    | 0.00066 | 0.00048                    | 0.00123 | *   |
| <i>Butyricimonas</i>                         | 0.21410                    | 0.21970 | 0.17080                    | 0.28030 | *   |
| <i>Bradyrhizobium</i>                        | 0.00021                    | 0.00080 | 0.00094                    | 0.00192 | *   |
| <i>Nitrospira</i>                            | 0                          | 0       | 0.00055                    | 0.00205 | *   |
| <i>Phenylobacterium</i>                      | 0                          | 0       | 0.00044                    | 0.00183 | *   |
| <i>H16</i>                                   | 0                          | 0       | 0.00031                    | 0.00106 | *   |
| <i>Mycobacterium</i>                         | 0                          | 0       | 0.00022                    | 0.00071 | *   |
| <i>Ruminococcaceae UCG014</i>                | 0.25370                    | 0.56220 | 0.38590                    | 1.49400 | *   |
| <i>Ruminococcaceae UCG005</i>                | 0.33350                    | 0.66570 | 0.33460                    | 1.07300 | *   |
| <i>Howardella</i>                            | 0.00738                    | 0.02855 | 0                          | 0       | *   |
| <i>Thiobacillus</i>                          | 0.00006                    | 0.00045 | 0.00274                    | 0.00942 | *   |
| <i>norank_f__Peptococcaceae</i>              | 0.00622                    | 0.01974 | 0.00125                    | 0.00451 | *   |
| <i>Negativicoccus</i>                        | 0.00004                    | 0.00036 | 0.00044                    | 0.00139 | *   |
| <i>Brevundimonas</i>                         | 0.00008                    | 0.00046 | 0.00081                    | 0.00246 | *   |
| <i>Ruminococcaceae NK4A214 group</i>         | 0.26540                    | 0.50280 | 0.15500                    | 0.32670 | *   |
| <i>Eubacterium ventriosum group</i>          | 0.09885                    | 0.15240 | 0.27500                    | 0.73180 | *   |
| <b>Species level</b>                         |                            |         |                            |         |     |
| <i>Sphingomonas sp.</i>                      | 0.00013                    | 0.00061 | 0.00218                    | 0.00361 | *** |
| <i>Turicibacter sp.</i>                      | 0.00008                    | 0.00045 | 0.00102                    | 0.00198 | *** |
| <i>Bacteroides plebeius</i>                  | 5.81600                    | 9.51500 | 4.09700                    | 9.58600 | *** |
| <i>Bacillus niacini</i>                      | 0.00004                    | 0.00032 | 0.00110                    | 0.00249 | **  |
| <i>Streptomyces sp.</i>                      | 0.00013                    | 0.00058 | 0.00126                    | 0.00255 | **  |
| <i>Faecalibaculum sp.</i>                    | 0.00008                    | 0.00045 | 0.00070                    | 0.00152 | **  |
| <i>Ruminiclostridium 9 sp.</i>               | 0.08016                    | 0.07195 | 0.04239                    | 0.04501 | **  |
| <i>Actinoallomurus sp.</i>                   | 0                          | 0       | 0.00093                    | 0.00347 | **  |
| <i>Brevundimonas variabilis</i>              | 0                          | 0       | 0.00074                    | 0.00245 | **  |
| <i>Tyzzerella sp.</i>                        | 0.04394                    | 0.23520 | 0.09864                    | 0.35680 | **  |
| <i>Clostridium sp. AT5</i>                   | 0.46670                    | 1.44800 | 1.03500                    | 2.48300 | *   |
| <i>Clostridiaceae bacterium</i>              | 0.00008                    | 0.00065 | 0.00146                    | 0.00432 | *   |
| <i>BARN424CC10</i>                           |                            |         |                            |         |     |
| <i>Candidatus Saccharibacteria bacterium</i> | 0.00127                    | 0.00478 | 0.00184                    | 0.00256 | *   |
| <i>UB2523</i>                                |                            |         |                            |         |     |

|                                                                        |         |         |         |         |   |
|------------------------------------------------------------------------|---------|---------|---------|---------|---|
| <i>Pseudarthrobacter sp.</i>                                           | 0.00008 | 0.00066 | 0.00048 | 0.00123 | * |
| <i>Bradyrhizobium elkanii</i>                                          | 0.00021 | 0.00081 | 0.00094 | 0.00192 | * |
| <i>Ruminococcaceae UCG002 sp.</i>                                      | 0.65870 | 0.95600 | 0.47780 | 0.90500 | * |
| <i>Corynebacterium 1 sp.</i>                                           | 0       | 0       | 0.00064 | 0.00260 | * |
| <i>Nitrospira sp.</i>                                                  | 0       | 0       | 0.00055 | 0.00205 | * |
| <i>Phenylobacterium sp.</i>                                            | 0       | 0       | 0.00044 | 0.00183 | * |
| <i>H16 sp.</i>                                                         | 0       | 0       | 0.00031 | 0.00106 | * |
| <i>Mycobacterium sp.</i>                                               | 0       | 0       | 0.00022 | 0.00071 | * |
| <i>Fusobacterium varium</i>                                            | 0.11590 | 0.55820 | 0.44550 | 1.15100 | * |
| <i>Christensenellaceae R7 group sp.</i>                                | 0.02437 | 0.09125 | 0.00077 | 0.00456 | * |
| <i>Parabacteroides merdae</i>                                          | 0.81990 | 1.36300 | 0.49420 | 0.87060 | * |
| <i>Ruminococcaceae NK4A214 group sp.</i>                               | 0.23890 | 0.44090 | 0.14630 | 0.32000 | * |
| <i>s__uncultured<br/>bacterium_g__Christensenellaceae R7<br/>group</i> | 0.01041 | 0.02602 | 0.01091 | 0.06126 | * |
| <i>Bacteroides coprophilus</i>                                         | 0.85670 | 3.08100 | 0.13160 | 0.55570 | * |
| <i>Thiobacillus sp.</i>                                                | 0.00006 | 0.00045 | 0.00274 | 0.00942 | * |
| <i>Ruminococcaceae bacterium AM2</i>                                   | 0.00004 | 0.00032 | 0.00252 | 0.00949 | * |
| <i>Butyricimonas sp.</i>                                               | 0.08892 | 0.13000 | 0.08087 | 0.18670 | * |
| <i>Actinomyces odontolyticus</i>                                       | 0.00793 | 0.02408 | 0.01229 | 0.02331 | * |
| <i>Ruminococcaceae UCG002 sp.</i>                                      | 0.88270 | 1.65500 | 0.85900 | 2.04900 | * |
| <i>Negativicoccus succinicivorans</i>                                  | 0.00004 | 0.00036 | 0.00044 | 0.00139 | * |
| <i>Eubacterium ramulus</i>                                             | 0.12710 | 0.21130 | 0.06727 | 0.14220 | * |
| <i>Bacteroides ovatus</i>                                              | 1.22900 | 2.13700 | 1.98100 | 2.53200 | * |
| <i>Desulfovibrio desulfuricans</i>                                     | 0.00052 | 0.00416 | 0.00203 | 0.00712 | * |
| <i>Butyricimonas virosa</i>                                            | 0.08962 | 0.16270 | 0.07544 | 0.16310 | * |
| <i>Parabacteroides goldsteinii</i>                                     | 0.07594 | 0.22490 | 0.05321 | 0.20390 | * |

\*, p value<0.05; \*\*, p value<0.01; \*\*\*, p value<0.001.

**Supplementary Table 2** GSRS (gastrointestinal symptom rating scale) scores on day 0 and day 56

| Variable                              | Group A (n=32) |           |       | Group B (n=31) |           |       |
|---------------------------------------|----------------|-----------|-------|----------------|-----------|-------|
|                                       | Day 0          | Day 56    | P     | Day 0          | Day 56    | P     |
| Abdominal pains                       | 0.44±0.10      | 0.53±0.13 | 0.366 | 0.42±0.11      | 0.16±0.07 | <0.05 |
| Abdominal distension                  | 0.75±0.11      | 0.22±0.07 | <0.05 | 0.84±0.14      | 0.32±0.11 | <0.05 |
| Borborygmus                           | 0.53±0.12      | 0.38±0.09 | 0.132 | 0.52±0.12      | 0.29±0.11 | 0.052 |
| Increased flatus                      | 0.44±0.12      | 0.25±0.09 | 0.130 | 0.65±0.15      | 0.29±0.11 | <0.05 |
| Increased passage of stools           | 0.06±0.04      | 0.13±0.06 | 0.414 | 0.13±0.10      | 0.26±0.12 | <0.05 |
| Decreased passage of stools           | 0.09±0.05      | 0.03±0.03 | 0.317 | 0.26±0.13      | 0.06±0.05 | 0.131 |
| Loose stools                          | 0.34±0.10      | 0.25±0.09 | 0.467 | 0.61±0.13      | 0.55±0.15 | 0.592 |
| Hard Stools                           | 0.28±0.10      | 0.38±0.13 | 0.366 | 0.39±0.14      | 0.10±0.05 | <0.05 |
| Urgent need for defecation            | 0.34±0.11      | 0.31±0.10 | 0.822 | 0.55±0.14      | 0.39±0.13 | 0.132 |
| Feeling of incomplete evacuation      | 0.59±0.13      | 0.28±0.09 | <0.05 | 0.68±0.13      | 0.32±0.09 | <0.05 |
| Eructation                            | 0.66±0.12      | 0.16±0.07 | <0.05 | 0.94±0.17      | 0.39±0.10 | <0.05 |
| Acid regurgitation                    | 0.66±0.12      | 0.16±0.07 | <0.05 | 0.26±0.09      | 0.03±0.03 | <0.05 |
| Heartburn                             | 0.41±0.11      | 0.19±0.07 | <0.05 | 0.35±0.10      | 0.10±0.07 | <0.05 |
| Nausea and vomiting                   | 0.41±0.12      | 0.19±0.07 | 0.052 | 0.29±0.11      | 0.16±0.07 | 0.206 |
| Sucking sensations in the epigastrium | 0.34±0.12      | 0.28±0.10 | 0.658 | 0.45±0.11      | 0.13±0.10 | <0.05 |
| Total score                           | 6.34±0.79      | 3.72±0.54 | <0.05 | 7.32±0.69      | 3.55±0.56 | <0.05 |

Data are presented as the mean ± standard error (SE). The p values are for differences of gastrointestinal symptom rating scale scores between day 0 and day 56 in each group (Wilcoxon signed rank test).

**Supplementary Table 3** Bristol stool scale score change after eradication therapy of *H. pylori*

|         | Group A     |             |       | Group B     |             |       |
|---------|-------------|-------------|-------|-------------|-------------|-------|
|         | Day 0       | Day 56      | P     | Day 0       | Day 56      | P     |
| Score-4 | 0.719±0.142 | 0.547±0.155 | 0.254 | 0.790±0.137 | 0.419±0.129 | <0.05 |

Data are presented as the mean  $\pm$  standard error (SE). Group A, *H. pylori*-infected patients with bismuth-containing quadruple therapy; Group B, *H. pylori*-infected patients with bismuth-containing quadruple therapy supplemented with *C. butyricum*.

**Supplementary Table 4** Adverse effects and compliance of different eradication regimens

|                               | <b>Group A (n=32)</b> | <b>Group B (n=31)</b> | <b>P</b> |
|-------------------------------|-----------------------|-----------------------|----------|
| Any adverse effects           | 13(40.6%)             | 7(22.6%)              | 0.124    |
| Skin rash                     | 4(12.5%)              | 2(6.5%)               | 0.698    |
| Pruritus                      | 4(12.5%)              | 2(6.5%)               | 0.698    |
| Headache                      | 0(0.0%)               | 0(0.0%)               |          |
| Dizziness                     | 3(9.4%)               | 3(9.7%)               | 1.000    |
| Fever                         | 3(9.4%)               | 1(3.2%)               | 0.628    |
| Bitter taste                  | 5(15.6%)              | 5(16.1%)              | 1.000    |
| Hepatic and renal dysfunction | 0(0.0%)               | 0(0.0%)               |          |
| Poor compliance               | 3(9.4%)               | 0(0.0%)               | 0.248    |

Group A, *H. pylori*-infected patients with bismuth-containing quadruple therapy; Group B, *H. pylori*-infected patients with bismuth-containing quadruple therapy supplemented with *C. butyricum*.
